# Supplementary material for: Different Transcutaneous Auricular Vagus Nerve Stimulation Parameters Modulate the Anti-Inflammatory Effects on Lipopolysaccharide-Induced Acute Inflammation in Mice
Source: MDPI journal article supplement (doi:10.3390/biomedicines10020247), 2022-01-24
Supplement: s1 [file s1]

**Different transcutaneous auricular vagus nerve stimulation parameters modulate the anti-inflammatory effects on lipopolysaccharide-induced acute inflammation in mice**

Yoon Young Go, PhD<sup>a,b</sup>, Won Min Ju<sup>a</sup>, Chan Mi Lee<sup>a</sup>, Sung-Won Chae, MD<sup>a,b</sup>, Jae-Jun Song, MD<sup>a,b,c,\*</sup>

<sup>a</sup>Department of Otorhinolaryngology- Head and Neck Surgery, Korea University Guro Hospital, Seoul 08308, Korea

<sup>b</sup>Institute for Health Care Convergence Center, Korea University Guro Hospital, Seoul 08308, Korea

<sup>c</sup>Neurive institute, Neurive Co.Ltd., Seoul 08308, Korea.

\*Corresponding author:

Jae-Jun Song, MD/PhD

Department of Otorhinolaryngology- Head and Neck Surgery,

Korea University Guro Hospital,

80 Guro-dong, Guro-gu,

Seoul 08308, South Korea

Tel: 82-2-2626-3186; Fax: 82-2-2626-0475; E-mail: [jjsong23@gmail.com](mailto:jjsong23@gmail.com)

## Supplementary materials

### Supplementary video. taVNS 15 Hz and 25 Hz

These videos show the taVNS treated mice in two different pulse frequencies of taVNS (15 Hz and 25 Hz).

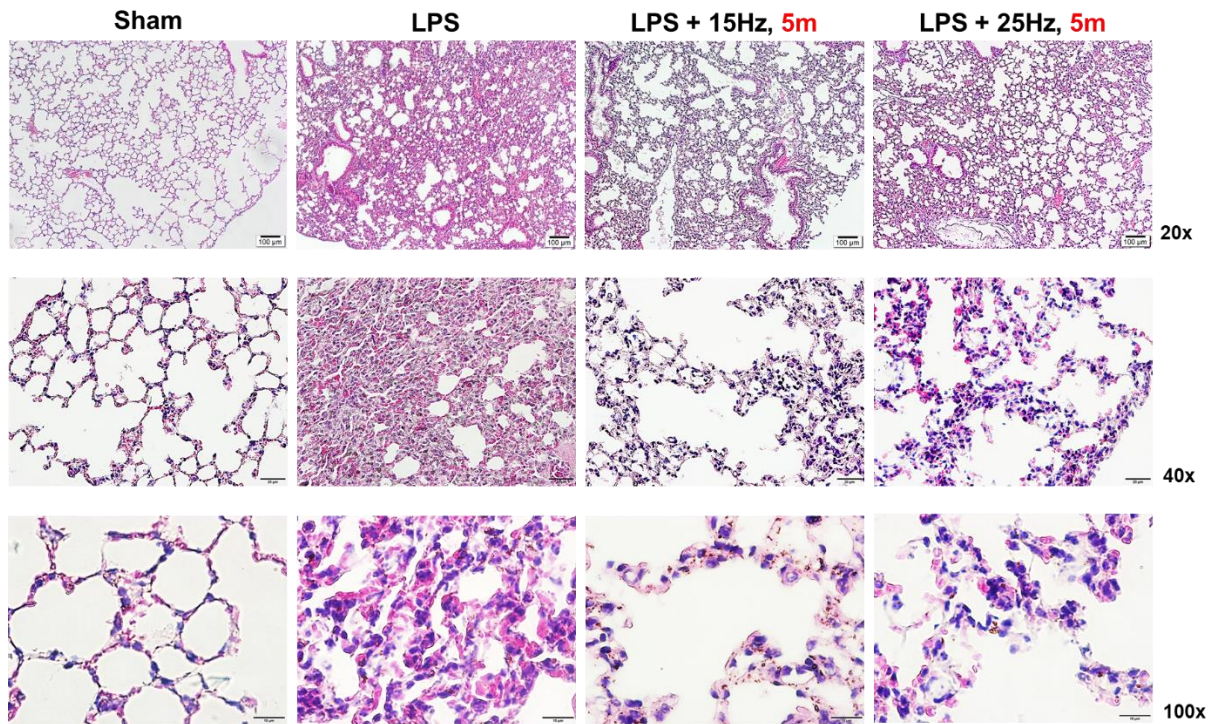

### Supplementary Figure S1. Histological evaluation of the lung in taVNS 15 Hz for 5 min and 25 Hz for 5 min on LPS-induced endotoxemia

Hematoxylin and eosin (H&E) staining results of the lung in taVNS treatment with 15 Hz for 5 min and 25 Hz for 5 min on LPS-induced inflammation. Scale bar: 100  $\mu$ m (20x), 20  $\mu$ m (40x), 10  $\mu$ m (100x), respectively.

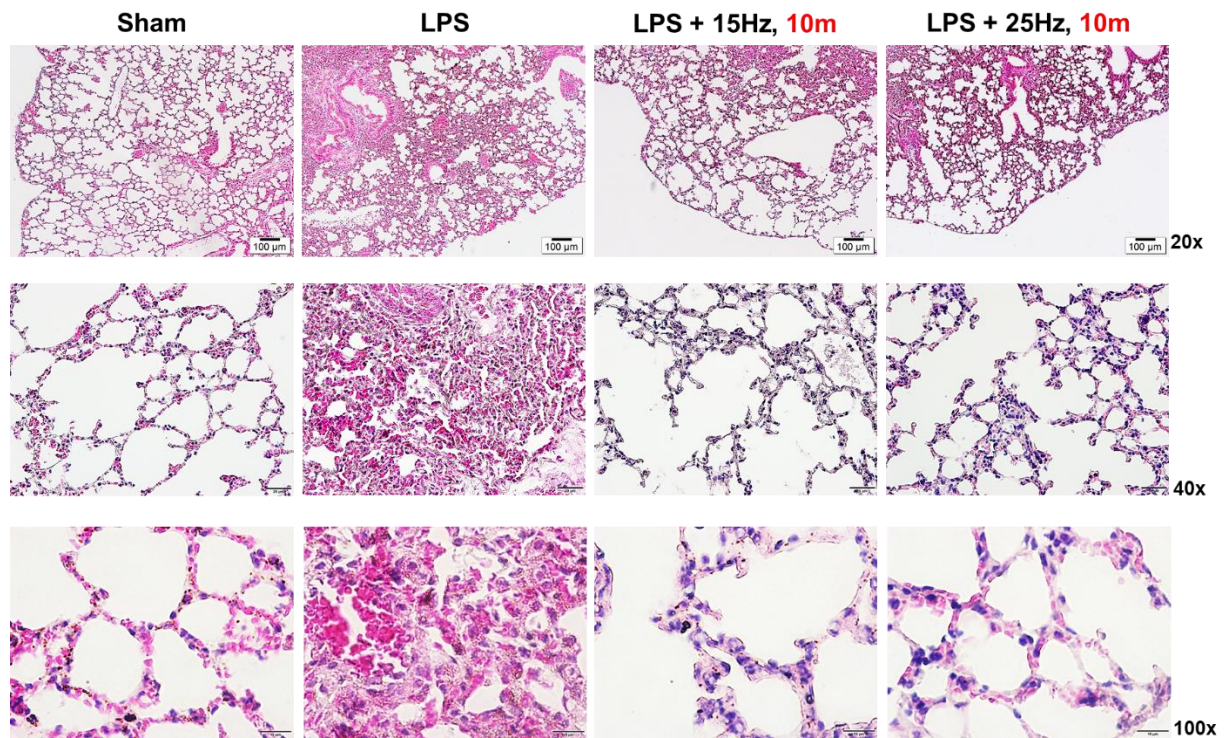

**Supplementary Figure S2. Histological evaluation of the lung in taVNS 15 Hz for 10 min and 25 Hz for 10 min on LPS-induced endotoxemia.**

Hematoxylin and eosin (H&E) staining results of the lung in taVNS treatment with 15 Hz for 10 min and 25 Hz for 10 min on LPS-induced inflammation. Scale bar: 100  $\mu\text{m}$  (20x), 20  $\mu\text{m}$  (40x), 10  $\mu\text{m}$  (100x), respectively.

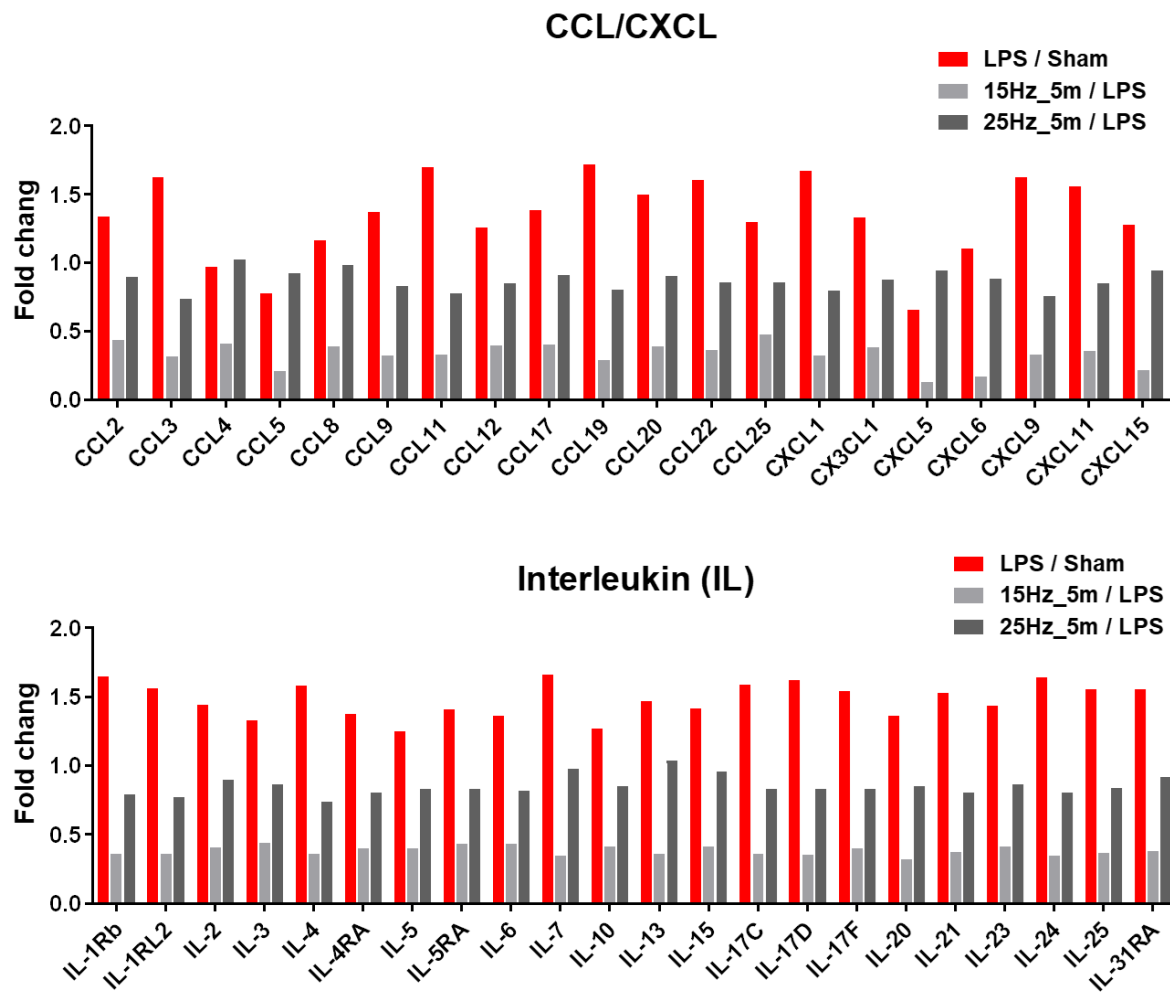

**Supplementary Figure S3. Fold changes of CCL/CXCL/IL in 15 Hz and 25 Hz taVNS on endotoxemia mice.**

The relative expression of CCL/CXCL/IL in 15 Hz and 25 Hz taVNS on LPS-induced inflammation were compared using fold changes.

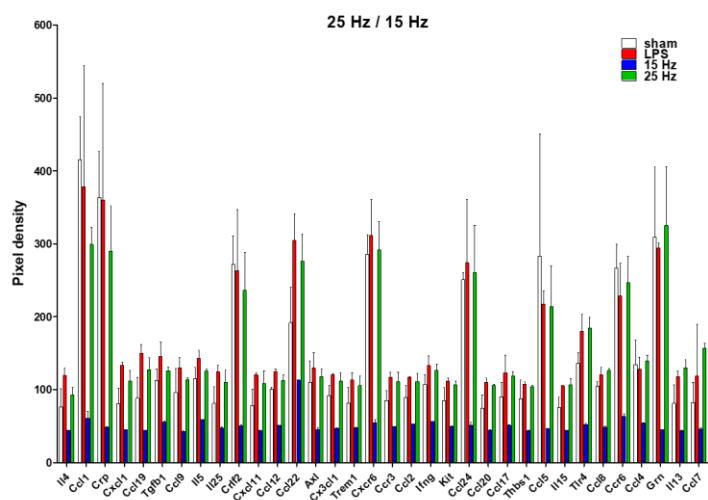

|               | Sham  |       | LPS   |       | 15 Hz |       | 25 Hz |       |
|---------------|-------|-------|-------|-------|-------|-------|-------|-------|
| <b>Il4</b>    | 94.0  | 58.5  | 127.0 | 111.5 | 44.5  | 44.0  | 85.5  | 100.0 |
| <b>Ccl1</b>   | 373.0 | 457.0 | 495.5 | 260.5 | 67.5  | 54.0  | 315.5 | 282.5 |
| <b>Crp</b>    | 318.5 | 408.0 | 473.0 | 247.5 | 49.5  | 48.0  | 333.5 | 246.0 |
| <b>Cxcl1</b>  | 96.0  | 65.5  | 130.0 | 136.5 | 45.0  | 44.5  | 102.0 | 122.0 |
| <b>Ccl19</b>  | 108.5 | 67.5  | 158.5 | 141.0 | 44.5  | 44.0  | 115.0 | 139.0 |
| <b>Tgfb1</b>  | 123.5 | 101.0 | 159.5 | 131.0 | 54.0  | 56.5  | 122.0 | 129.5 |
| <b>Ccl9</b>   | 119.5 | 72.0  | 140.0 | 120.0 | 42.0  | 43.5  | 115.5 | 112.0 |
| <b>Il5</b>    | 126.5 | 104.5 | 151.0 | 134.0 | 59.0  | 59.0  | 123.0 | 127.5 |
| <b>Il25</b>   | 97.5  | 64.5  | 131.0 | 118.0 | 48.5  | 46.0  | 98.5  | 122.0 |
| <b>Crtf2</b>  | 299.0 | 244.5 | 322.5 | 204.0 | 48.5  | 51.5  | 273.0 | 199.5 |
| <b>Cxcl11</b> | 94.0  | 62.5  | 122.0 | 118.5 | 43.5  | 44.0  | 96.0  | 120.5 |
| <b>Ccl12</b>  | 99.0  | 102.5 | 127.0 | 122.0 | 51.0  | 51.0  | 106.5 | 118.0 |
| <b>Ccl22</b>  | 226.0 | 157.5 | 330.5 | 279.0 | 113.5 | 113.0 | 249.5 | 302.5 |
| <b>Axl</b>    | 130.5 | 89.5  | 144.5 | 114.5 | 47.0  | 44.0  | 125.0 | 110.5 |
| <b>Cx3cl1</b> | 101.5 | 81.5  | 121.5 | 119.0 | 47.5  | 46.5  | 104.0 | 119.5 |
| <b>Trem1</b>  | 96.5  | 66.5  | 120.0 | 106.0 | 48.0  | 46.5  | 96.0  | 114.5 |
| <b>Cxcr6</b>  | 304.5 | 267.0 | 346.5 | 276.0 | 57.5  | 52.5  | 319.0 | 264.0 |
| <b>Ccr3</b>   | 95.0  | 75.0  | 112.5 | 122.0 | 49.5  | 49.5  | 101.5 | 120.0 |
| <b>Ccl2</b>   | 100.5 | 77.0  | 117.5 | 117.0 | 53.0  | 52.5  | 103.5 | 119.0 |
| <b>Ifng</b>   | 116.5 | 97.5  | 142.5 | 123.5 | 56.5  | 56.0  | 119.5 | 132.5 |
| <b>Kit</b>    | 97.5  | 72.0  | 115.0 | 109.0 | 48.5  | 50.0  | 102.5 | 110.5 |
| <b>Ccl24</b>  | 257.5 | 244.0 | 335.5 | 212.5 | 54.0  | 49.0  | 306.5 | 215.0 |
| <b>Ccl20</b>  | 87.5  | 62.0  | 114.0 | 106.5 | 45.0  | 44.0  | 106.0 | 107.0 |
| <b>Ccl17</b>  | 104.0 | 76.0  | 140.0 | 106.5 | 50.0  | 51.5  | 123.0 | 114.0 |
| <b>Thbs1</b>  | 105.5 | 69.5  | 104.5 | 110.0 | 44.0  | 43.5  | 103.5 | 105.0 |
| <b>Ccl5</b>   | 401.5 | 165.0 | 230.0 | 205.0 | 46.0  | 47.0  | 253.5 | 174.5 |
| <b>Il15</b>   | 85.5  | 65.0  | 105.5 | 105.0 | 44.5  | 44.5  | 100.5 | 112.5 |
| <b>Tlr4</b>   | 146.5 | 126.0 | 196.5 | 163.0 | 51.0  | 53.0  | 195.0 | 174.0 |
| <b>Ccl8</b>   | 109.0 | 101.0 | 127.5 | 113.5 | 50.0  | 47.0  | 128.0 | 124.0 |
| <b>Ccr6</b>   | 289.5 | 243.0 | 196.0 | 260.5 | 65.5  | 61.0  | 272.5 | 220.5 |
| <b>Ccl4</b>   | 158.0 | 111.0 | 116.5 | 139.5 | 54.5  | 54.0  | 145.0 | 134.5 |
| <b>Grn</b>    | 377.0 | 240.5 | 289.0 | 299.0 | 45.0  | 45.0  | 382.0 | 268.0 |
| <b>Il13</b>   | 99.0  | 63.5  | 123.0 | 112.5 | 44.0  | 42.5  | 137.5 | 122.0 |
| <b>Ccl7</b>   | 102.0 | 62.5  | 68.5  | 169.0 | 47.0  | 45.0  | 152.5 | 161.5 |

**Supplementary Figure S4. The pixel intensity of chemokines/cytokines in 15 Hz and 25 Hz taVNS on endotoxemia mice.**

The significantly downregulated chemokines/cytokines are listed in the graph and table.
